# Supplementary material for: In Vitro Pre-Clinical Evaluation of a Gonococcal Trivalent Candidate Vaccine Identified by Transcriptomics
Source: MDPI journal article supplement (doi:10.3390/vaccines11121846), 2023-12-13
Supplement: s1 [file s1]

# Supplemental Table S1. NGO0690 predicted linear (LE) and conformational (CE) epitopes

## NGO0690

>WP\_003691259.1 hypothetical protein [Neisseria gonorrhoeae]

MNKTLSILPAAILLGGCAAGNTFGSLDGGTGMGGSIVKMTVESQCRAELDRRSEWRLTALAMSAEKQAEWENKICGCATEEAPNQLTGND  
VMQMLNQSTRNQALAALTVKTVSACFKRLYR

| Linear Epitopes (LE)         |       |     |                                  |          |                       |
|------------------------------|-------|-----|----------------------------------|----------|-----------------------|
| n.                           | Start | End | Sequence                         | Residues | ElliPro Score Color * |
| 1                            | 20    | 33  | <u>GGNTFGSLDGGTGM</u>            | 14       | 0.8 Trsp Wheat        |
| 2                            | 52    | 70  | RRSEWRLTALAMSAEKQAE              | 19       | 0.7 Lt Pink           |
| 3                            | 93    | 100 | MQMLNQST                         | 8        | 0.64 Green            |
| Conformational epitopes (CE) |       |     |                                  |          |                       |
| 1                            |       |     | <u>G20-T23</u>                   | 4        | 0.94 Trsp Dk Gray     |
| 2                            |       |     | <u>F24-M33</u>                   | 10       | 0.75 Trsp Dk Gray     |
| 3                            |       |     | R53-E55, R57-E70                 | 17       | 0.74 Dk Gray          |
| 4                            |       |     | L87-N90, M93-Q94, L96-T100, Q103 | 12       | 0.67 Dk Gray          |

Gray-highlighted residues in the sequence above: predicted signal peptide, not shown in the cartoon models in **Figure 11A**, **11A<sub>I</sub>** and **11A<sub>II</sub>**

Dashed underlined: Low confidence regions predicted by AlphaFold (yellow / orange in **Figure 11A**)

\* Epitope color in **Figure 11A<sub>I</sub>** and **A<sub>II</sub>**

## Supplemental Table S2. NGO0948 predicted linear (LE) and conformational (CE) epitopes

### NGO0948

>WP\_003693315.1 outer membrane protein assembly factor BamC [Neisseria gonorrhoeae]

MPSEPFGRHNMTNTLISITQDDTMTHIKPVIAALALIGLAACSGSKTEQPKLDYQSRSHRLIKLEVPPDLNNPDQGNLYRLPAGSGAVRASDLKRRTPAVQQPADAIEVLKSVKGVRLERDGSQRWLVDGKSPAETWPLLKAFWQENGFDIESEPAIGOMETEWAENRAKIPQDSLRLFDTVGLGGIYSTGERDKFIVRIEQGKNGVSDIFFAHKAMKEVYGDKNKDTMWQPSASDPNLEAAFLTRFMQYLGVDGRQAENALAKKPTLPAANEMARIEGKSLIVFGDYGRNWRRTGLALDRIGLTVVGQNTERHAFLVQKAPNESNAVTEQKPGFLFKRLLGKGKAEKPAEQPELIVYAEPVADGSRIVLLNKDGSAYAGKDASALLGKLHSELR

| Linear epitopes (LE)         |       |     |                                                                        |          |               |                 |
|------------------------------|-------|-----|------------------------------------------------------------------------|----------|---------------|-----------------|
| n.                           | Start | End | Sequence                                                               | Residues | ElliPro Score | Color *         |
| 1                            | 1     | 44  | MPSEPFGRHNMTNTLISITQDDTMTHIKPVIAALALIGLAACSG                           | 44       | 0.87          | Trsp White      |
| 2                            | 61    | 115 | LIKLEVPPDLNNPDQGNLYRLPAGSGAVRASDLKRRTPAVQQPADAIEVLKSVKG                | 55       | 0.74          | Trsp Wheat      |
| 3                            | 173   | 192 | IPQDSLRLRFDTVGLGGIYS                                                   | 20       | 0.68          | \$ Trsp Lt Pink |
| 4                            | 224   | 233 | YGDKNKDTTM                                                             | 10       | 0.71          | Trsp Green      |
| 5                            | 280   | 292 | RIEGKSLIVFGDY                                                          | 13       | 0.58          | Dk Pink         |
| 6                            | 314   | 319 | NTERHA                                                                 | 6        | 0.63          | Ruby            |
| 7                            | 331   | 387 | AVTEQKPGFLFKRLLGKGKAEKPAEQPELIVYAEPVADGSRIVLLNKDGSAYAGKDAS             | 57       | 0.66          | Taupe           |
| Conformational epitopes (CE) |       |     |                                                                        |          |               |                 |
| 1                            |       |     | M1-T19                                                                 | 19       | 0.97          | -               |
| 2                            |       |     | Q20-H26                                                                | 7        | 0.94          | -               |
| 3                            |       |     | P29-A40, C42-G44                                                       | 15       | 0.72          | Trsp White      |
| 4                            |       |     | L61-I62, L64                                                           | 3        | 0.58          | Trsp Dk Gray    |
| 5                            |       |     | E65-Y79                                                                | 15       | 0.82          | Trsp Dk Gray    |
| 6                            |       |     | L81-K95, T98-L110                                                      | 28       | 0.74          | Trsp \$ Dk Gray |
| 7                            |       |     | K111-K114, G256                                                        | 5        | 0.56          | Dk Gray \$\$    |
| 8                            |       |     | G115, D130-S133, E136, G206-V210                                       | 11       | 0.53          | Dk Gray         |
| 9                            |       |     | I173-P174, D176-L178, L181-F182                                        | 7        | 0.64          | Dk Gray \$      |
| 10                           |       |     | D183-Y191                                                              | 9        | 0.74          | Dk Gray         |
| 11                           |       |     | Y224-M233, S329, N330-Q335                                             | 17       | 0.62          | Dk Gray         |
| 12                           |       |     | R280-S285, I287, F289-Y292, N314-A319, K351-I359, Y361-R370, V372-S387 | 52       | 0.63          | Dk Gray         |
| 13                           |       |     | K336-K341                                                              | 6        | 0.79          | Dk Gray \$      |
| 14                           |       |     | L343-E350                                                              | 8        | 0.80          | Dk Gray \$      |

Gray-highlighted residues in the sequence: predicted putative signal peptide, only shown in the cartoon model in **Figure 11b and 11B**.

Dashed underlined: Low confidence regions predicted by AlphaFold (yellow / orange in **Figure 11B**)

\* Epitope color in **Figure 11B<sub>i</sub>** and **11B<sub>ii</sub>**

\$ Partial view in the cartoon model in **Figure 11B<sub>ii</sub>**

\$\$ Not visible in the cartoon model in **Figure 11B<sub>ii</sub>**

Italic: Residues not predicted in LE

### Supplemental Table S3. NGO1701 predicted linear (LE) and conformational (CE) epitopes

NGO1701

>WP\_003689877.1 four-helix bundle copper-binding protein [Neisseria gonorrhoeae]

MNRRQFLGSAAAVSLASAASFARAHGHADYHHHHDMQPAAASAYTAVRQTAAHCLDAGQVCLTHCLSLLTQGDTSMSDCAVAVRQMLALCGAV  
HDLAAQNSPLTRDAAKVCLEACKQCAKACKEHSAHHAECKACYESCLDCIKECEKLAA

| Linear epitopes (LE)         |                                               |     |                      |          |               |                 |
|------------------------------|-----------------------------------------------|-----|----------------------|----------|---------------|-----------------|
| n.                           | Start                                         | End | Sequence             | Residues | ElliPro Score | Color *         |
| 1                            | 25                                            | 44  | HGHADYHHHHDMQPAAASAY | 20       | 0.82          | Wheat           |
| 2                            | 63                                            | 78  | THCLSLLTQGDTSMSD     | 16       | 0.74          | Lt Pink         |
| 3                            | 99                                            | 106 | QNSPLTRD             | 8        | 0.63          | Green           |
| 4                            | 123                                           | 133 | KEHSAHHAECK          | 11       | 0.62          | Dk Pink         |
| 5                            | 147                                           | 151 | EKLAA                | 5        | 0.75          | Ruby            |
| Conformational epitopes (CE) |                                               |     |                      |          |               |                 |
| 1                            | H25-H31                                       |     |                      | 7        | 0.96          | Trsp<br>Dk Gray |
| 2                            | Q37-Y44, Q99-L103, R105-D106, K109, K149-A151 |     |                      | 20       | 0.68          | Dk Gray         |
| 3                            | T63-D78, K123-E131, K133, E137                |     |                      | 27       | 0.70          | Dk Gray         |

Gray-highlighted residues in the sequence: predicted signal peptide, not shown in the cartoon models in **Figure 11C<sub>I</sub>, 12C<sub>I</sub> and 11C<sub>II</sub>**

Dashed underlined: Low confidence regions predicted by AlphaFold (yellow / orange in **Figure 11C**)

\* Epitope color in **Figure 11C<sub>I</sub> and 11C<sub>II</sub>**

Italic: Residues not predicted in LE
